CORRECTION

# Correction: Transgenic Fatal Familial Insomnia Mice Indicate Prion Infectivity-Independent Mechanisms of Pathogenesis and Phenotypic Expression of Disease

The *PLOS Pathogens* Staff

## Notice of Republication

This article was republished on June 23, 2015, to correct errors in Tables 1 and 2 that were introduced during the typesetting process. The publisher apologizes for the errors. Please download this article again to view the correct version. The corrected article is provided here for reference.

## Supporting Information

**S1 File. Republished, corrected article.**  
(PDF)

## References

1. Bouybayoune I, Mantovani S, Del Gallo F, Bertani I, Restelli E, Comerio L, et al. (2015) Transgenic Fatal Familial Insomnia Mice Indicate Prion Infectivity-Independent Mechanisms of Pathogenesis and Phenotypic Expression of Disease. *PLoS Pathog* 11(4): e1004796. doi: [10.1371/journal.ppat.1004796](https://doi.org/10.1371/journal.ppat.1004796) PMID: [25880443](https://pubmed.ncbi.nlm.nih.gov/25880443/)

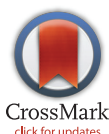

## OPEN ACCESS

**Citation:** The *PLOS Pathogens* Staff (2015) Correction: Transgenic Fatal Familial Insomnia Mice Indicate Prion Infectivity-Independent Mechanisms of Pathogenesis and Phenotypic Expression of Disease. *PLoS Pathog* 11(7): e1005046. doi:10.1371/journal.ppat.1005046

**Published:** July 6, 2015

**Copyright:** © 2015 The PLOS Pathogens Staff. This is an open access article distributed under the terms of the [Creative Commons Attribution License](https://creativecommons.org/licenses/by/4.0/), which permits unrestricted use, distribution, and reproduction in any medium, provided the original author and source are credited.
